# Supplementary material for: Harpagide Alleviates Cerebral Ischemic Injury via AMPK-MCU Phosphorylation-Dependent Inhibition of Mitochondrial Calcium Overload
Source: Research Square preprint supplement (doi:10.21203/rs.3.rs-8705254/v1), 2026-02-20
Supplement: Supplementary file 1 [file 652deb4d0837dca23fad1a9c.docx]

**Figur 2A Figur 2D**

harpagide

harpagide

Control

Control

RR

OGD

RR

OGD

kDa

kDa


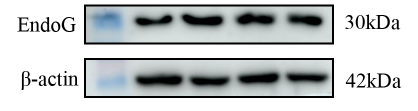

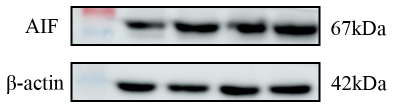


42

30

Endo G

Actin

42

67

Actin

AIF


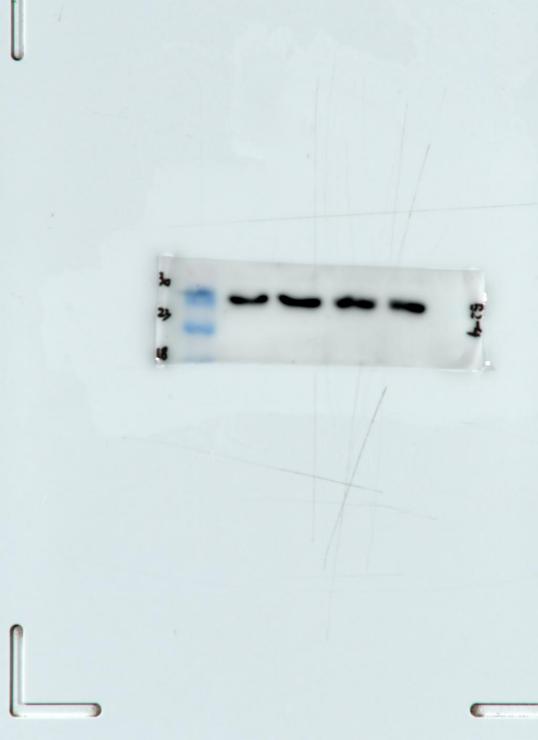

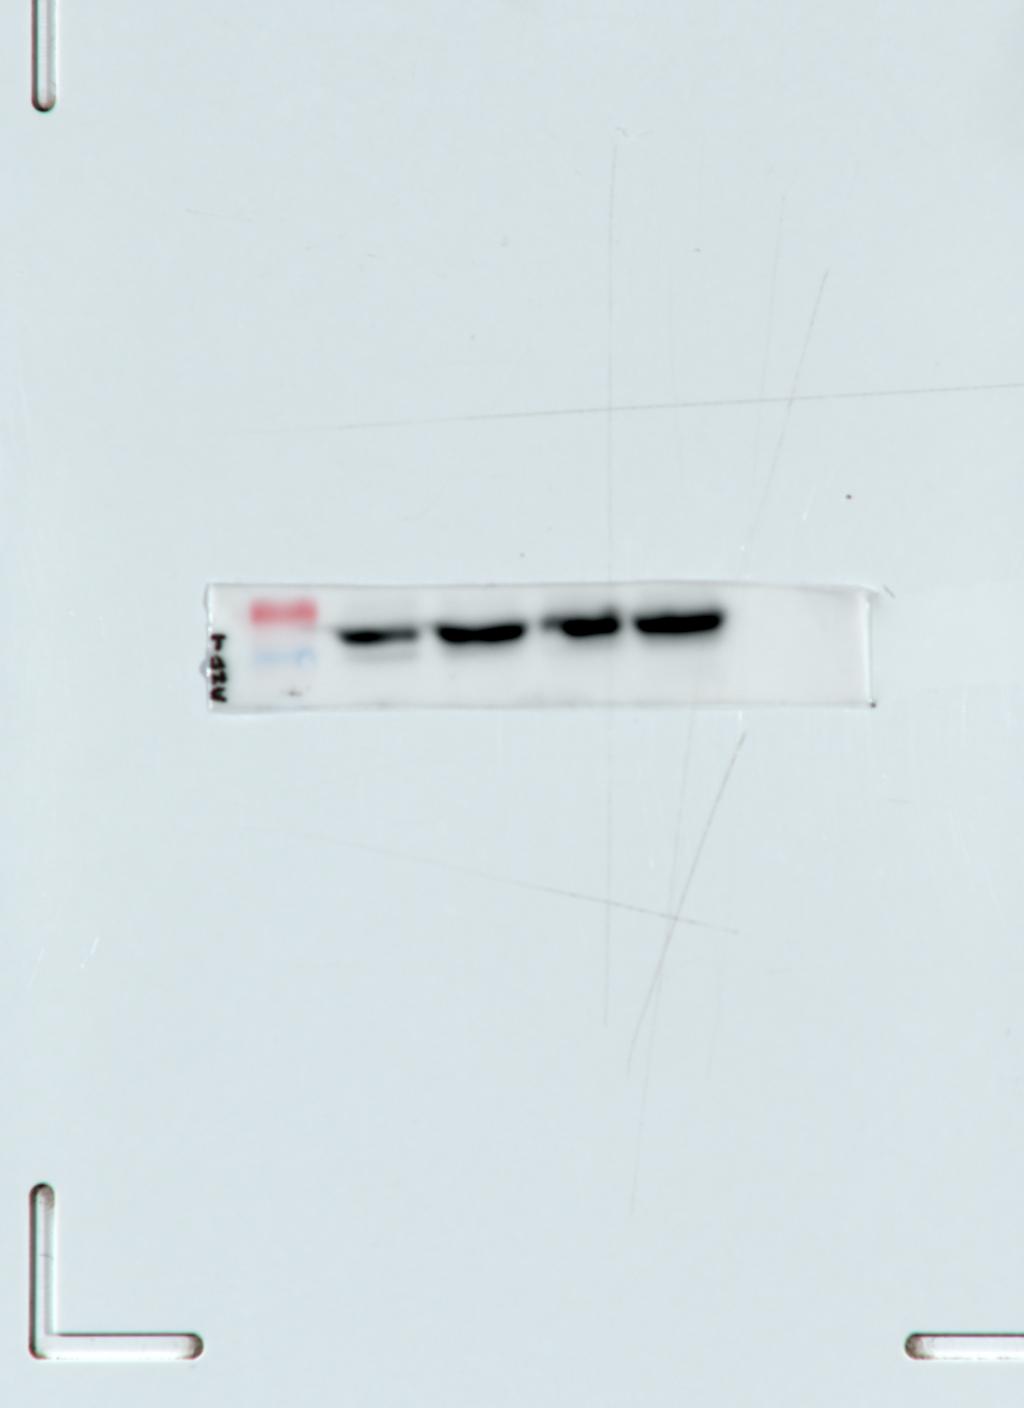


30

23

18

75

55


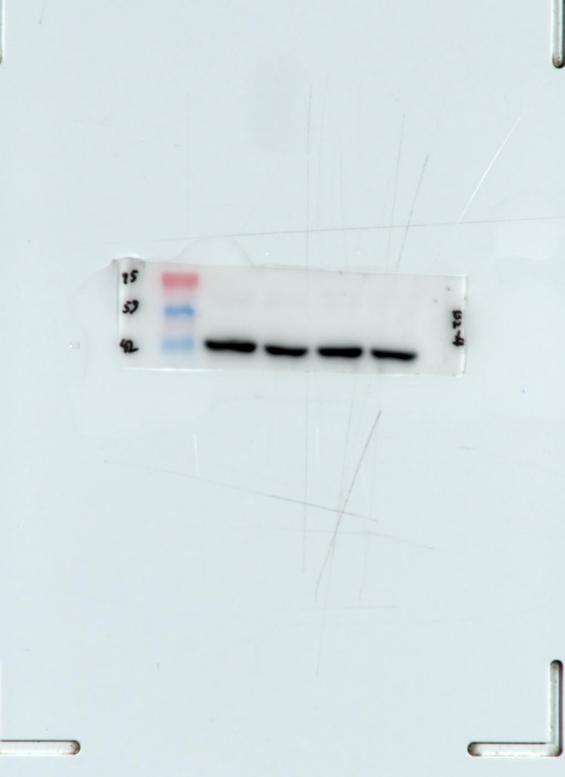

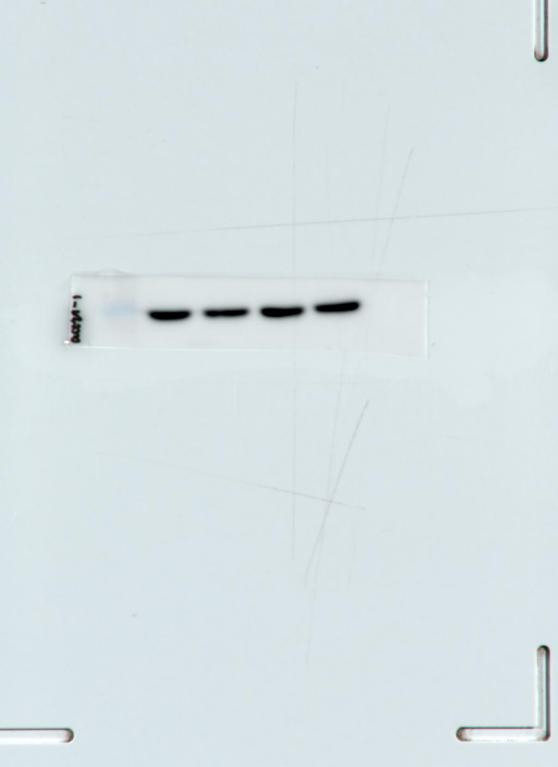


75

55

42

42


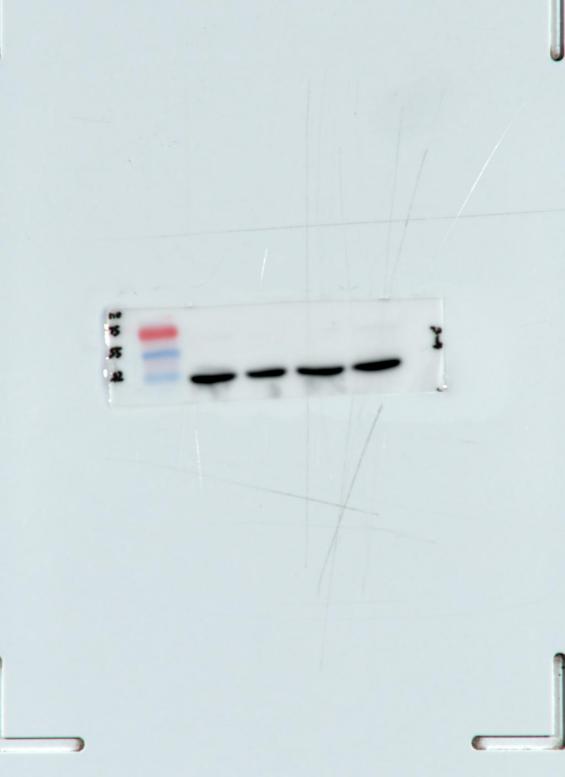

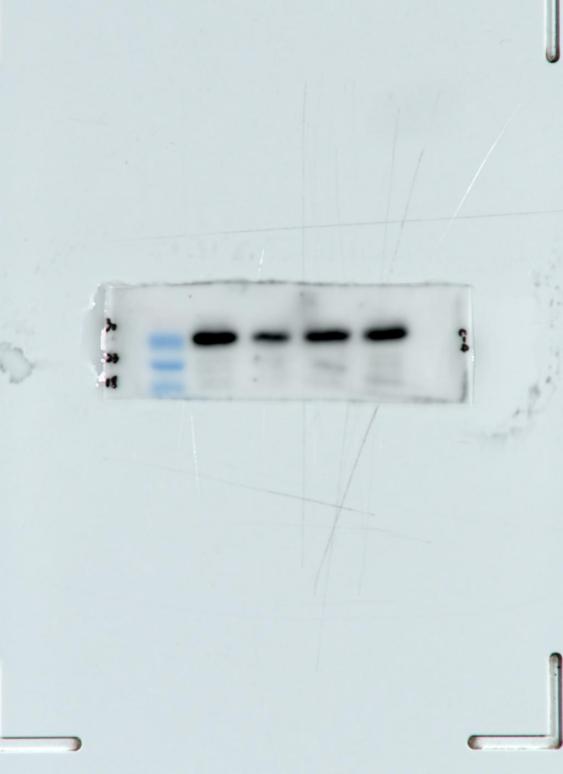

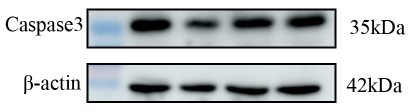
**
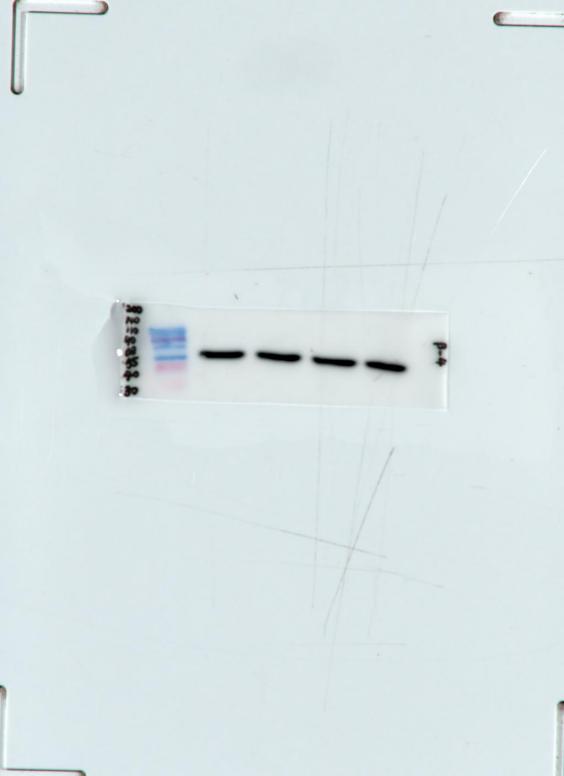

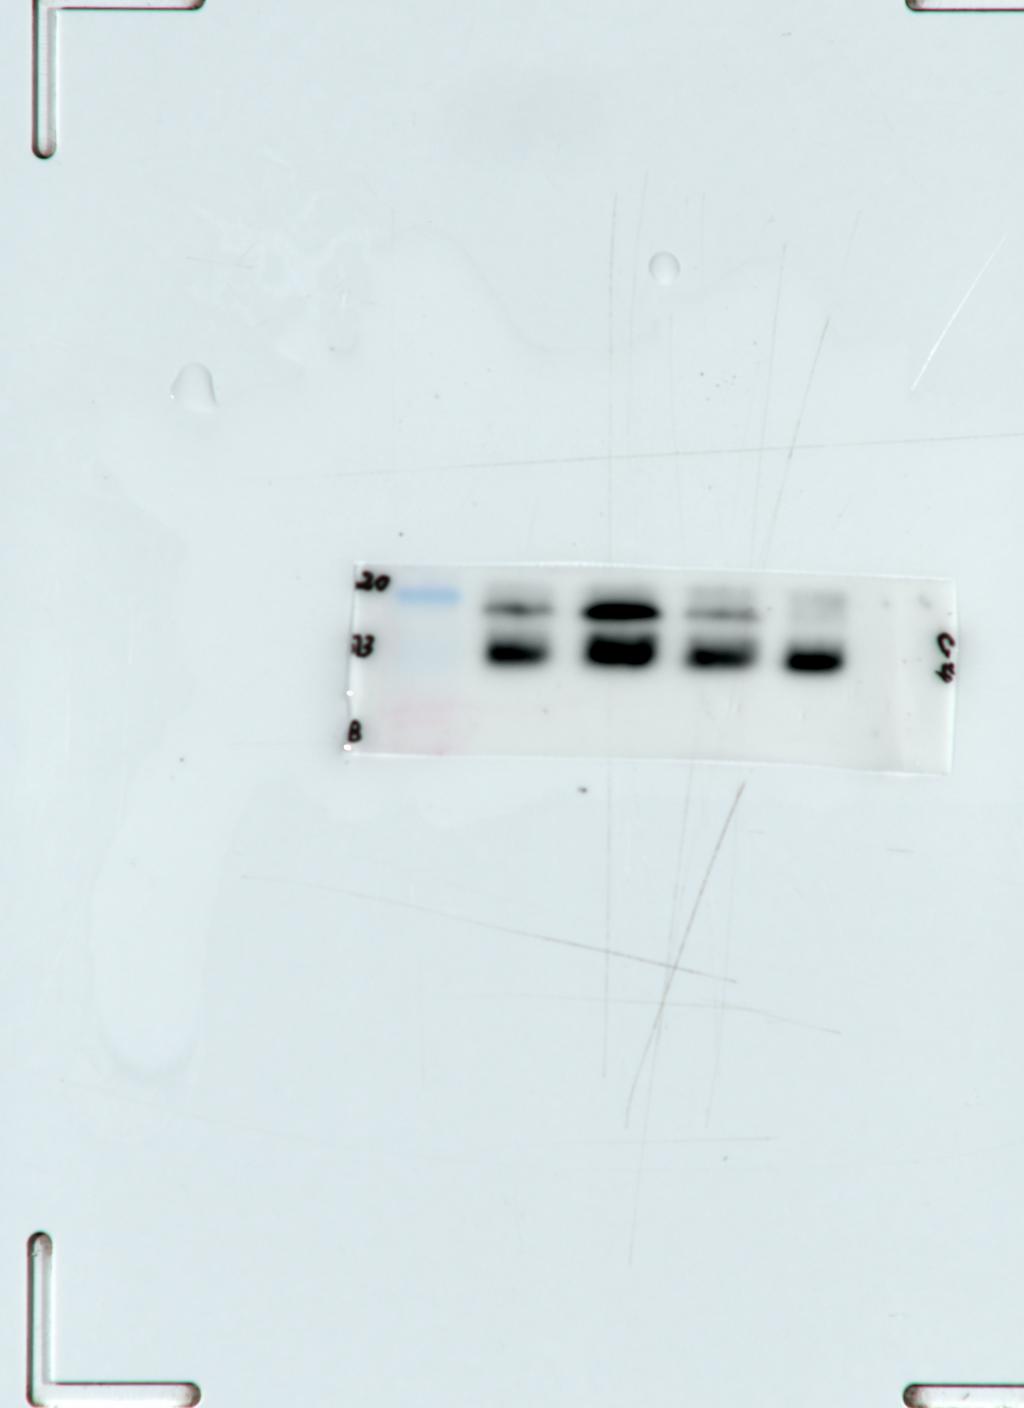
**
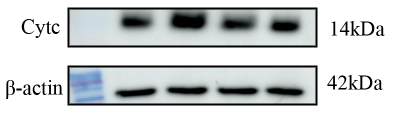
**Figur 2G Figur 2J**

75

55

42

30

23

18

kDa

42

35

Actin

Caspase3

Control

200

140110

75

55

42

30

23

18

10

42

harpagide

harpagide

RR

OGD

Control

RR

OGD

kDa

14

Actin

Cytc

**
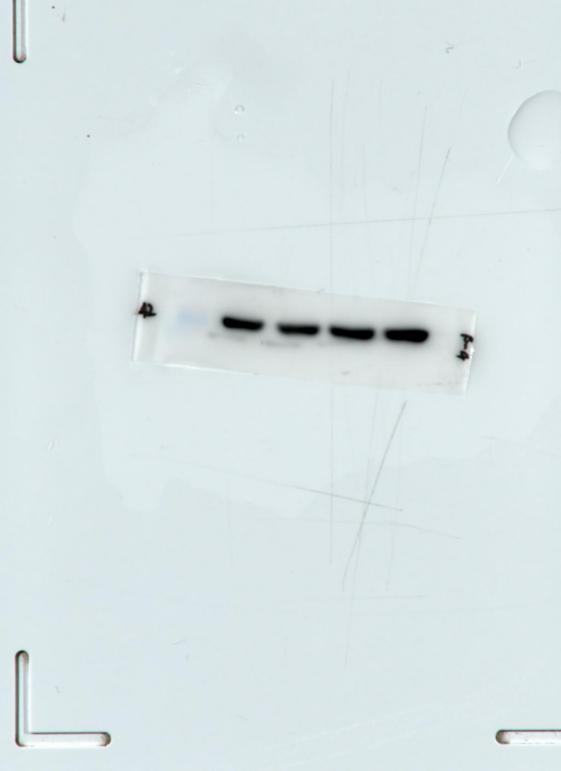

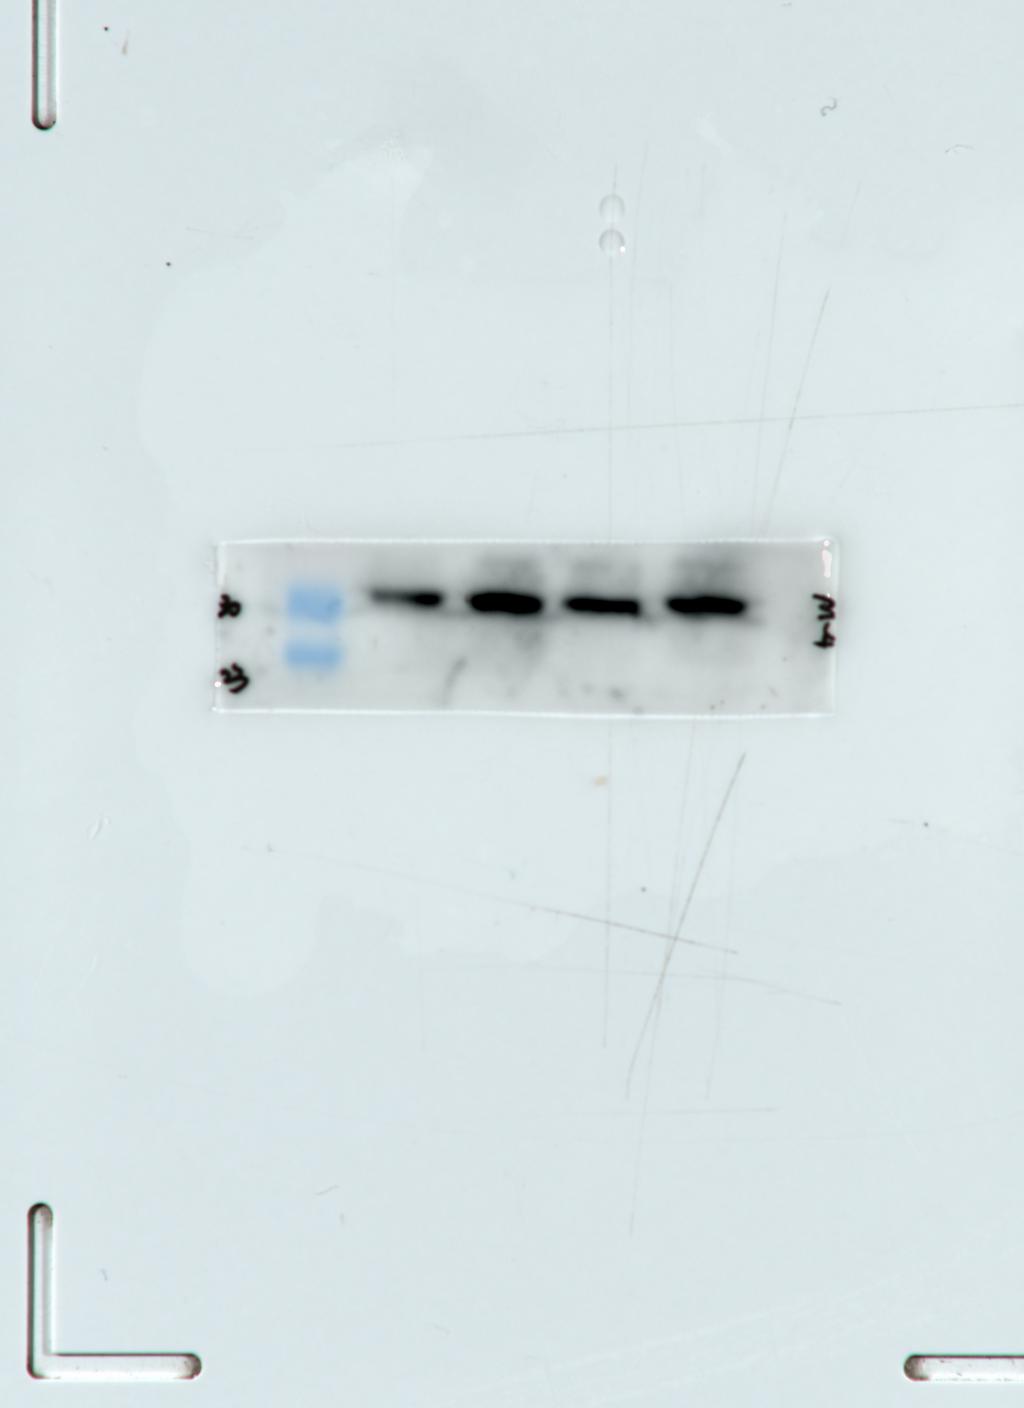
**
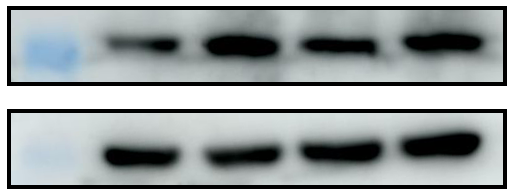
**
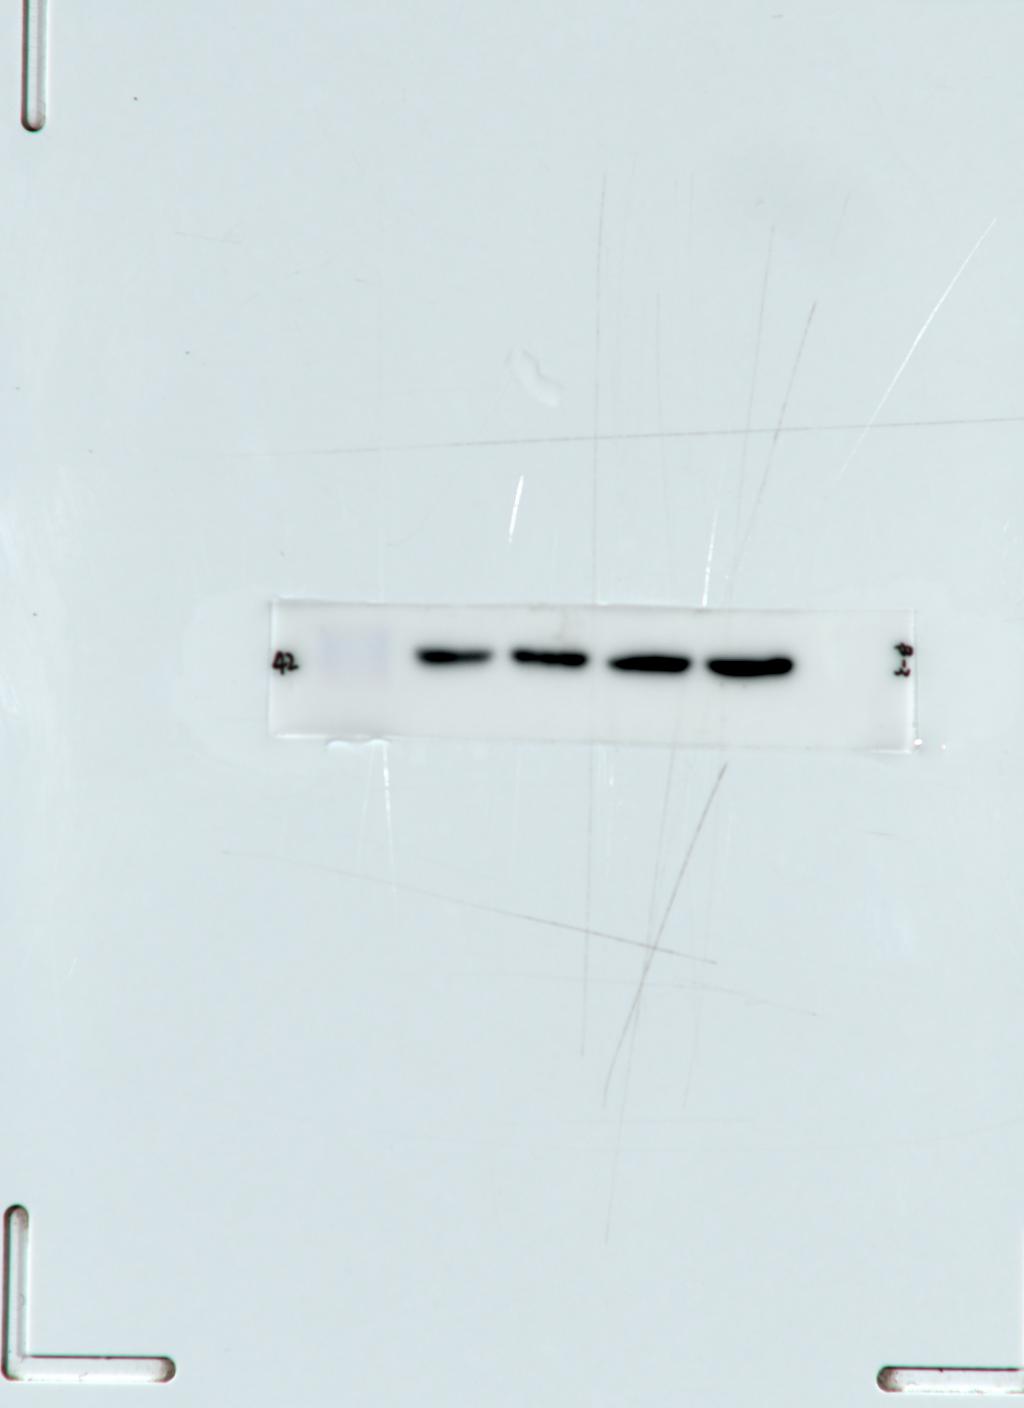

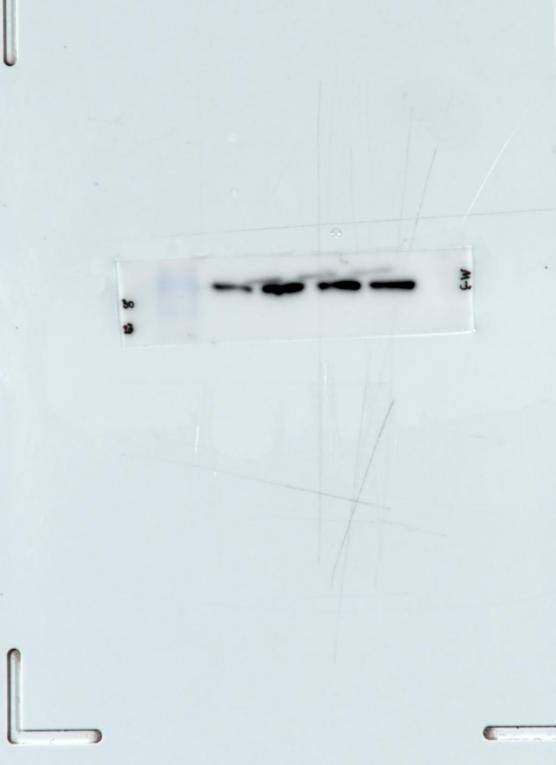
**
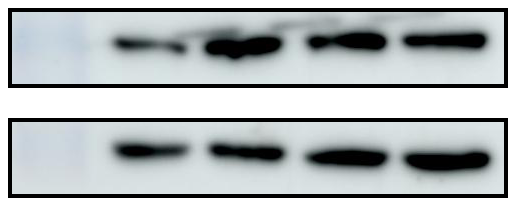
**Figur 4A Figur 5G**

42

30

23

42

30

23

Control

CC

OGD

kDa

30

Actin

MCU

42

harpagide

42

harpagide

Control

RR

OGD

kDa

30

Actin

MCU

**
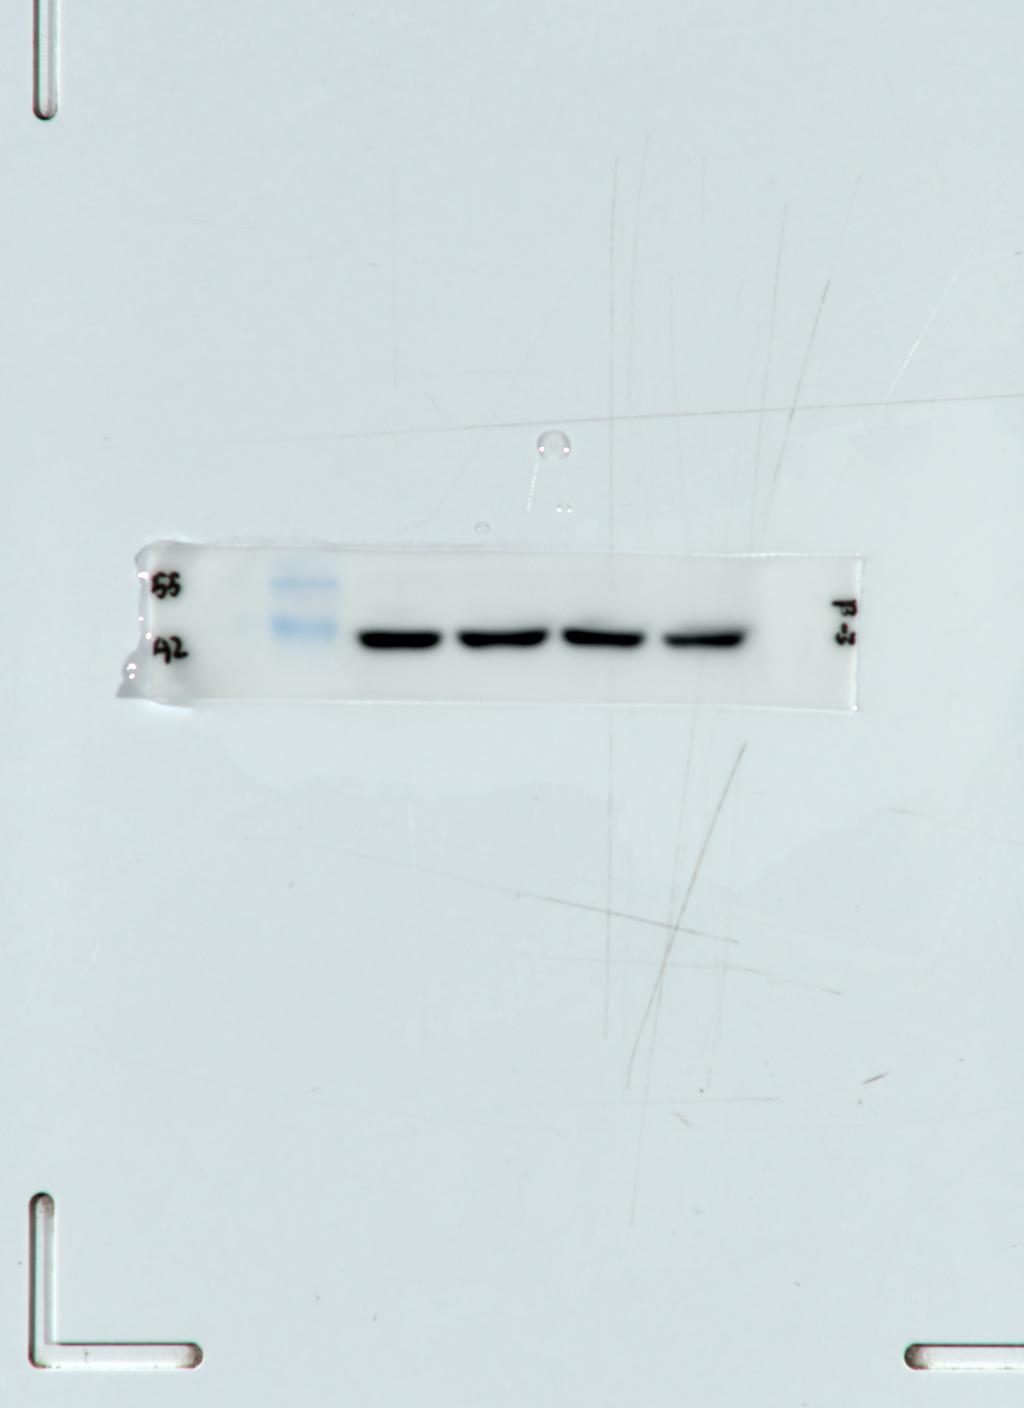

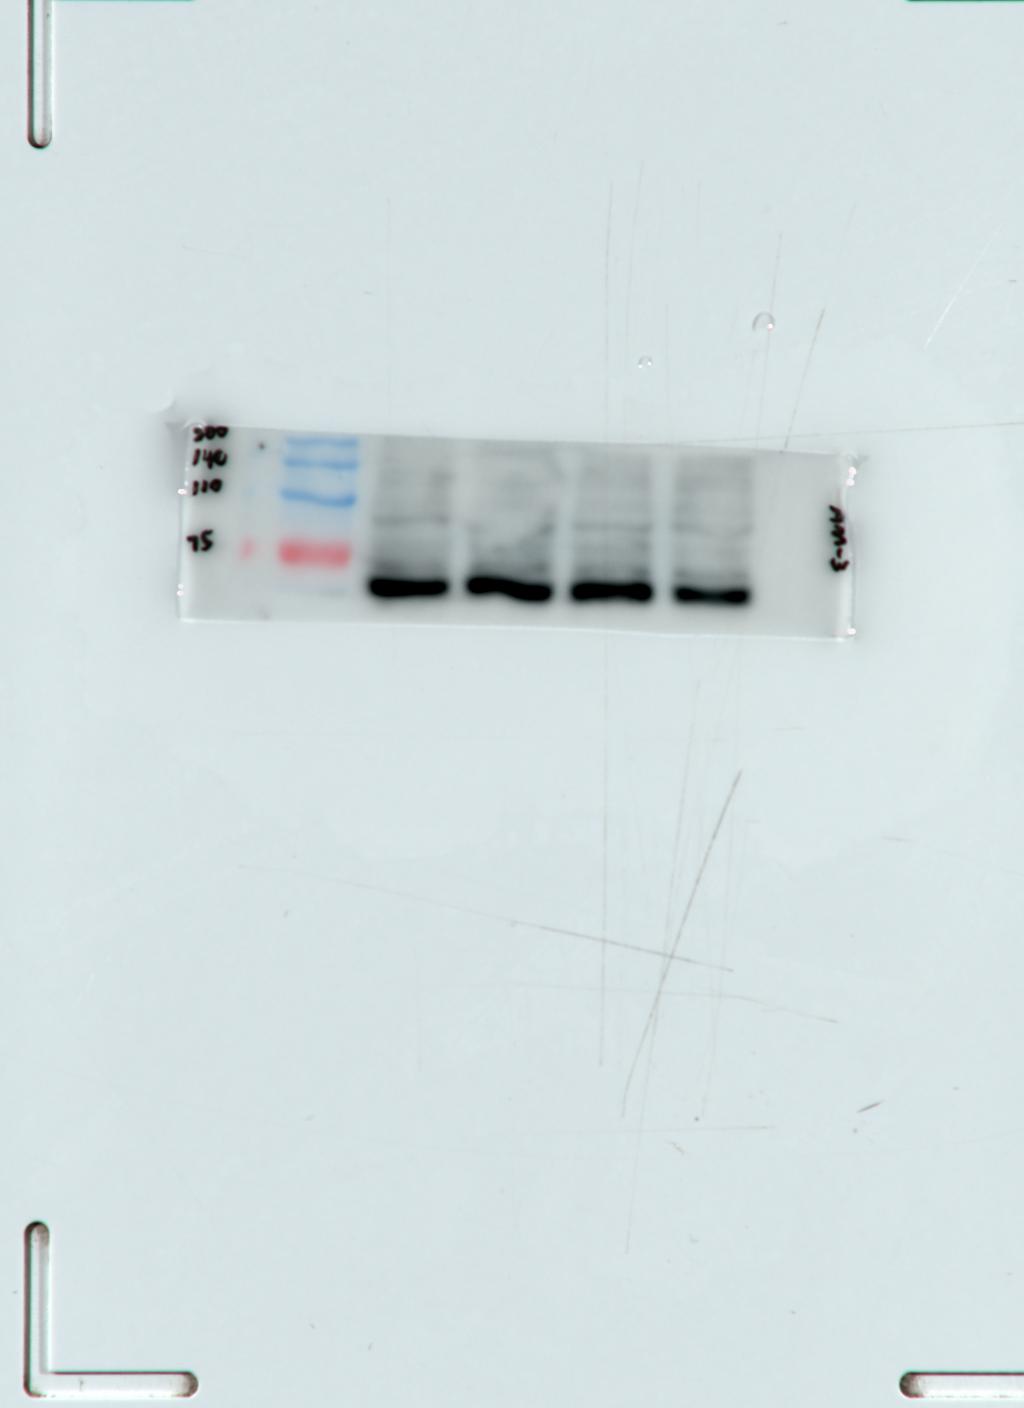
**
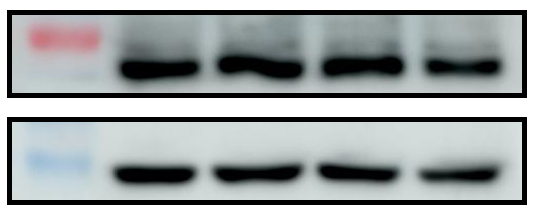
**
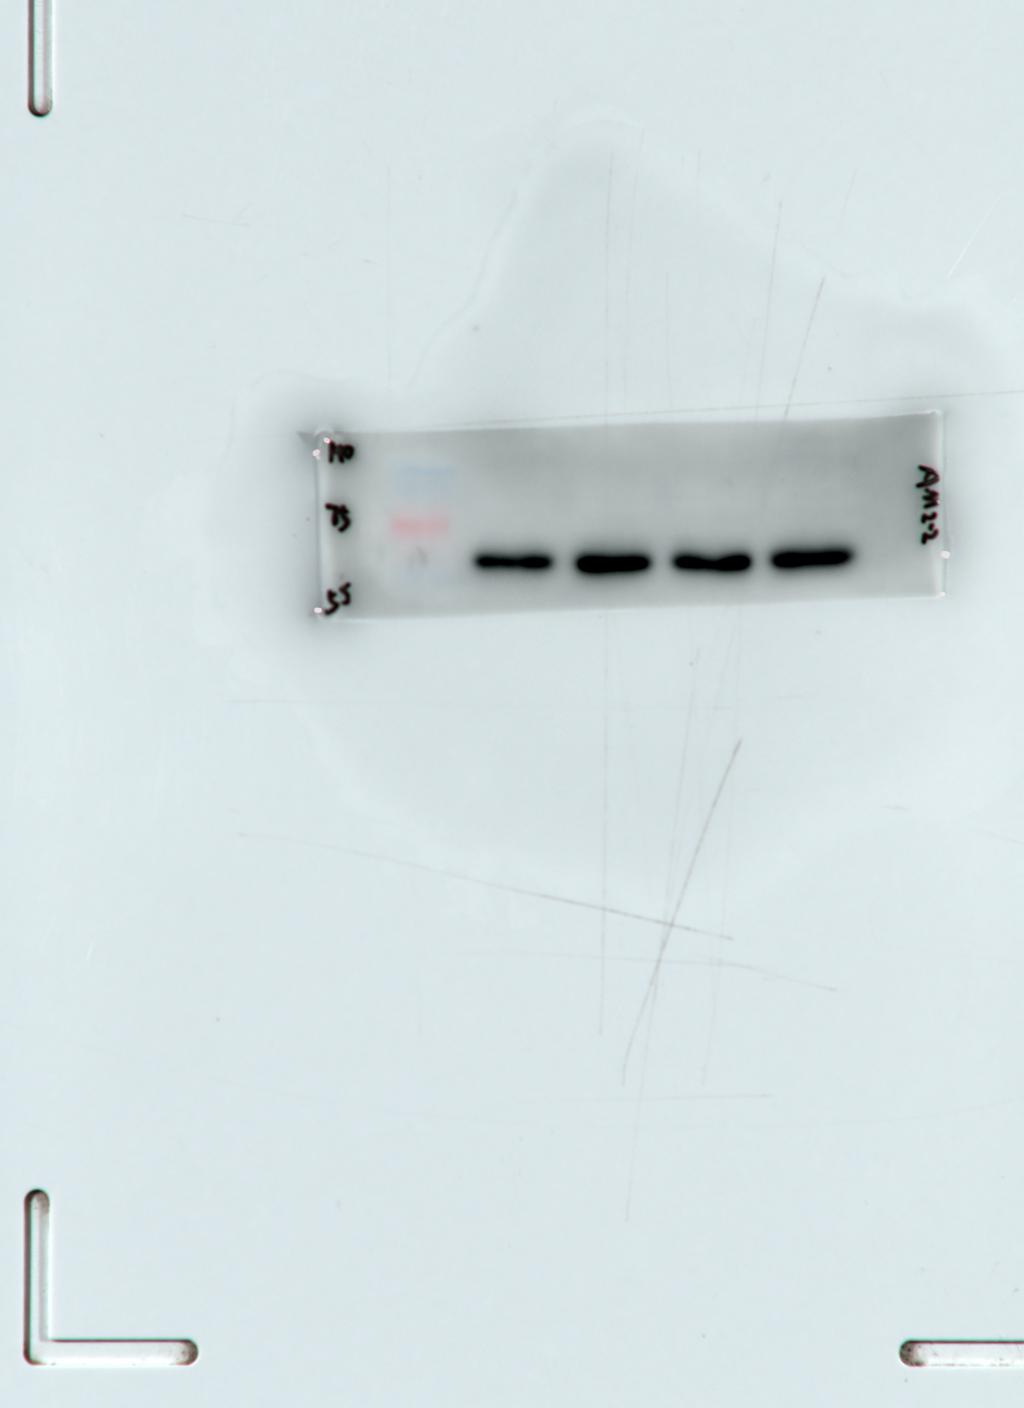

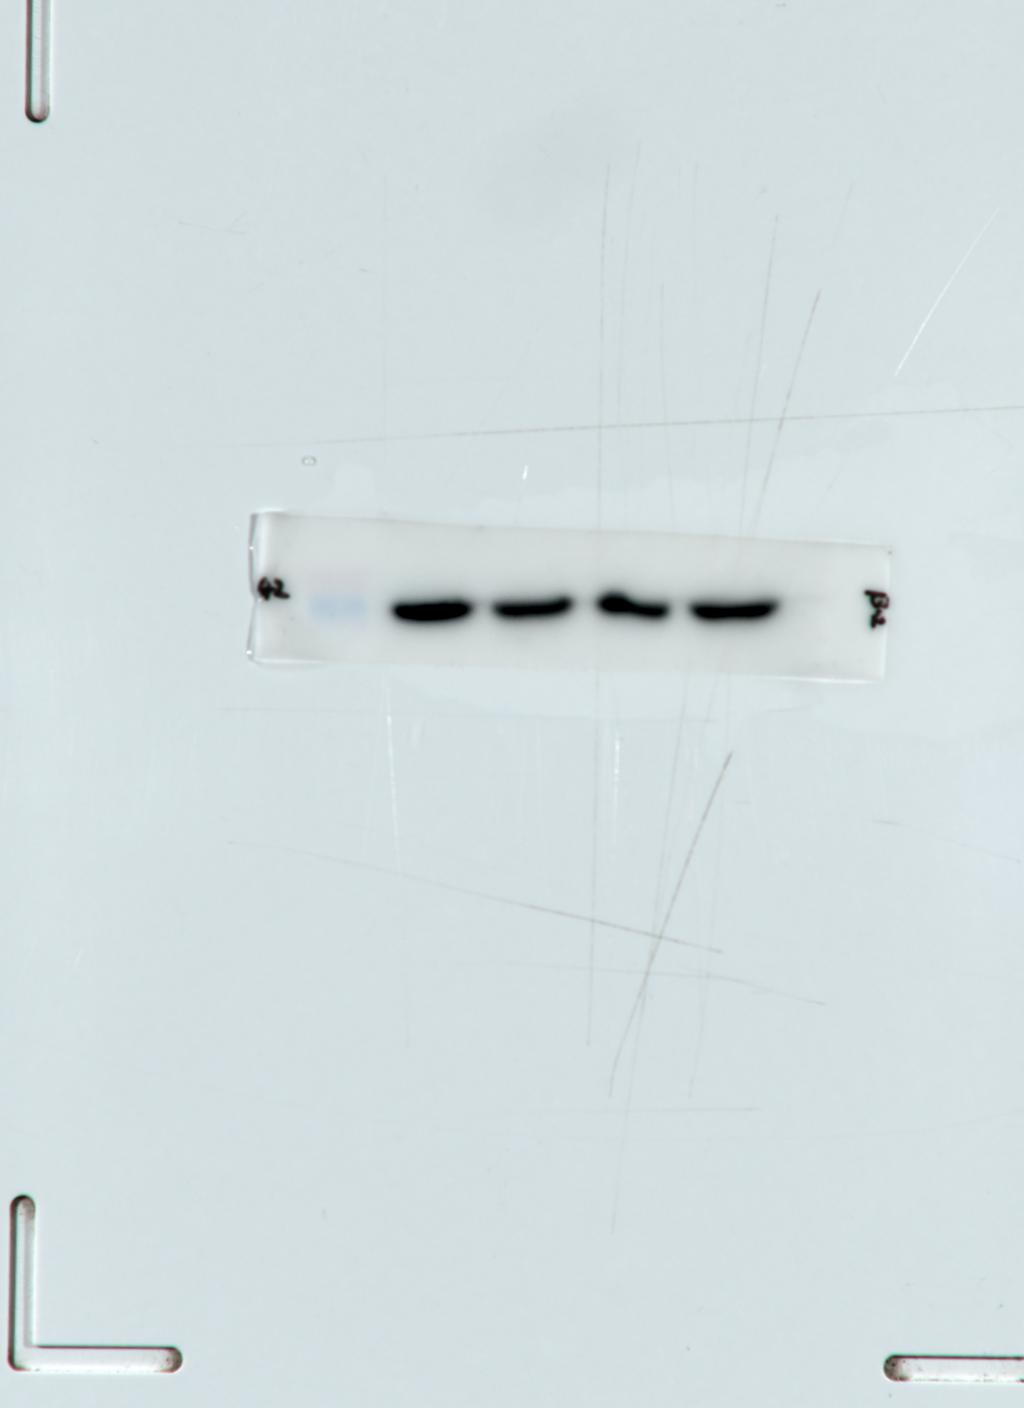
**
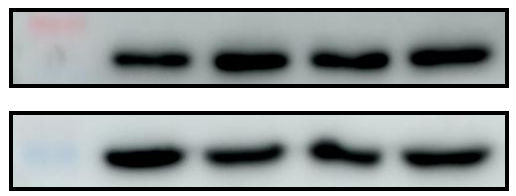
**Figur 5J Figur 6B**

Control

Control

OGD

CC

CC

OGD

55

42

200

140110

75

42

110

75

55

62

Actin

AMPK

kDa

62

Actin

AMPK

42

harpagide

42

harpagide

kDa

**Figur 6D Figur 6F**

Control

OGD

CC

55

42

30

Actin

MCU

42

harpagide

kDa


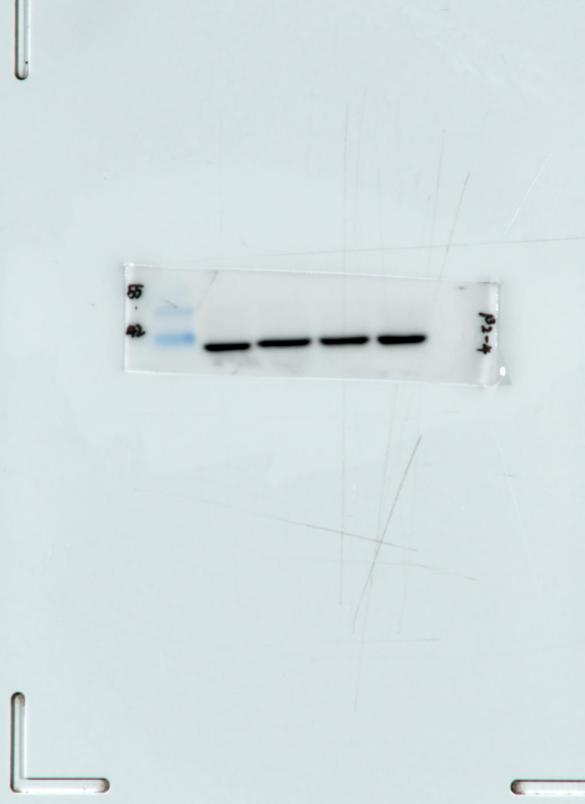

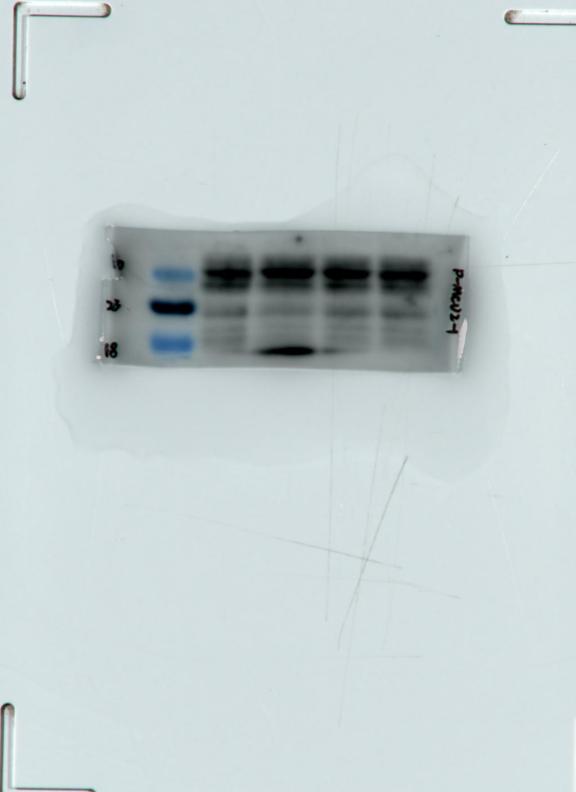

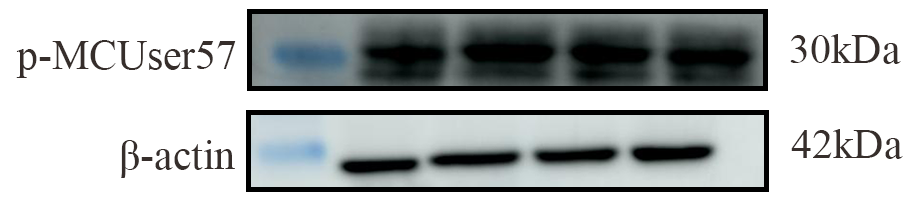

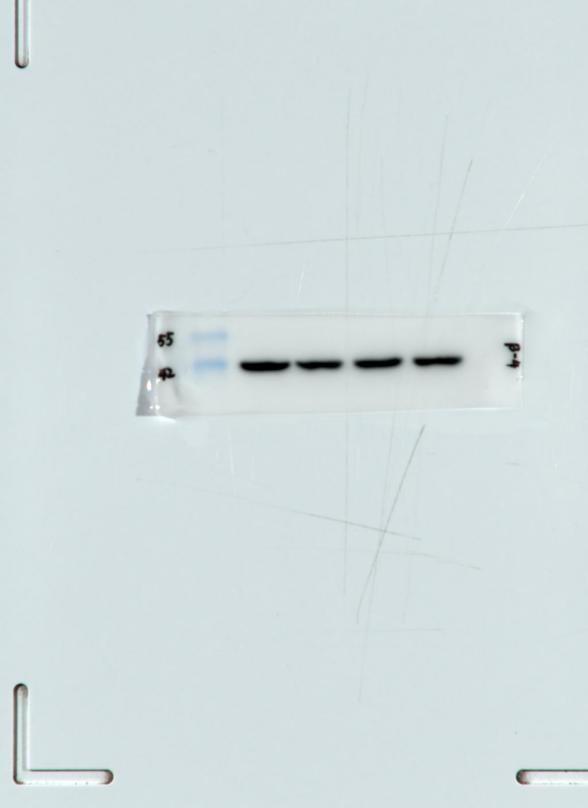
**
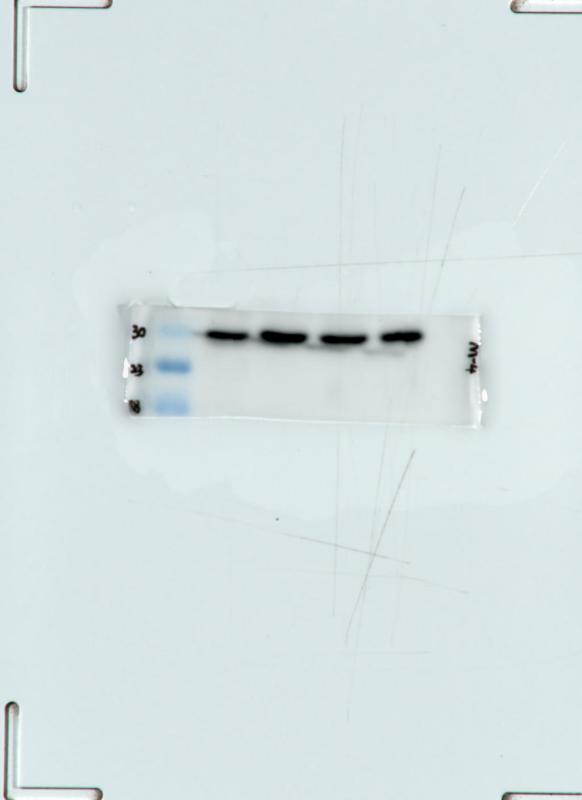
**
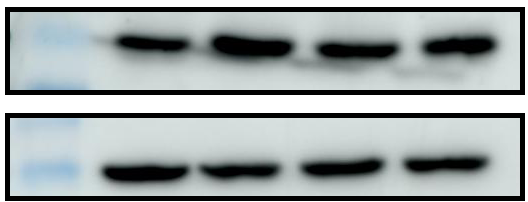


30

23

18

55

42

30

23

18

Actin

p-MCUser57

Control

OGD

harpagide

CC

kDa

42

30
