# Supplementary material for: Harpagide Alleviates Cerebral Ischemic Injury via AMPK-MCU Phosphorylation-Dependent Inhibition of Mitochondrial Calcium Overload
Source: Research Square preprint supplement (doi:10.21203/rs.3.rs-8705254/v1), 2026-02-20
Supplement: Supplementary file 2 [file 70082a80956dbcd551d4506f.docx]

**Harpagide from *Scrophularia*: Regulation of AMPK-MCU Phosphorylation to Inhibit Mitochondrial Calcium Overload and Alleviate Cerebral Ischemic Injury**

Ke Wang a,1,* Huai-yu Liu b,1 Yue-Wang c Gen-zheng Su d Jin-lai Gao a Yan-Ping Wang e Zhi He a,b,*

a Department of Pharmacology, College of Medicine, Jiaxing University, Jiaxing, 314001, PR China.

b College of Medicine and Health Sciences, China Three Gorges University, Yichang, 443002, PR China.

c Xinmai Pharmaceutical Co., Ltd. Beijing, 100195,PR China

d College of Life Science and Medicine, Zhejiang Sci-Tech University, Hangzhou, 310018, PR China

e JiaXing Key Laboratory of Fundamental and Clinical Research on Cerebral Protection in Acute Ischemic Cerebrovascular Disease(A), Jiaxing, 314001, PR China.

* Corresponding author.

E-mail address: wangke@zjxu.edu.cn(K. Wang), lhuaiyu1999@163.com(Y. Liu), 17381350209@163.com(Y. Wang), 2023220903020@mails.zstu.edu.cn(G.Su), gaojinlai@zjxu.edu.cn (J. Gao), [ypwang93@163.com(Y](mailto:ypwang93@163.com(Y). Wang), hezhi2023@zjxu.edu.cn(Z. He)

1 These authors contributed equally to this work

**Supplemental Data**

**Table of Contents**

[Figure S1. Quantitative Reference Material of Harpagide. 2](#_Toc24205)

[Table S1 Primer Sequences for RT-PCR Analysis 3](#_Toc19778)

Figure S2 Dose-Dependent Protective Effects of Harpagide against OGD-Induced Injury in SH-SY5Y Cells………………………………………………………………3

**Quantitative Reference Material of Harpagide**

The structural formula of harpagide, drafted using Chemdraw 20.0 (Cambridge, MA, USA) software, is shown in Figure S1A. The structural formula of Ruthenlum Red and Compound C are presented in Figure S1B-C. The harpagide content was determined using high-performance liquid chromatography (HPLC), and it was 99.6%.


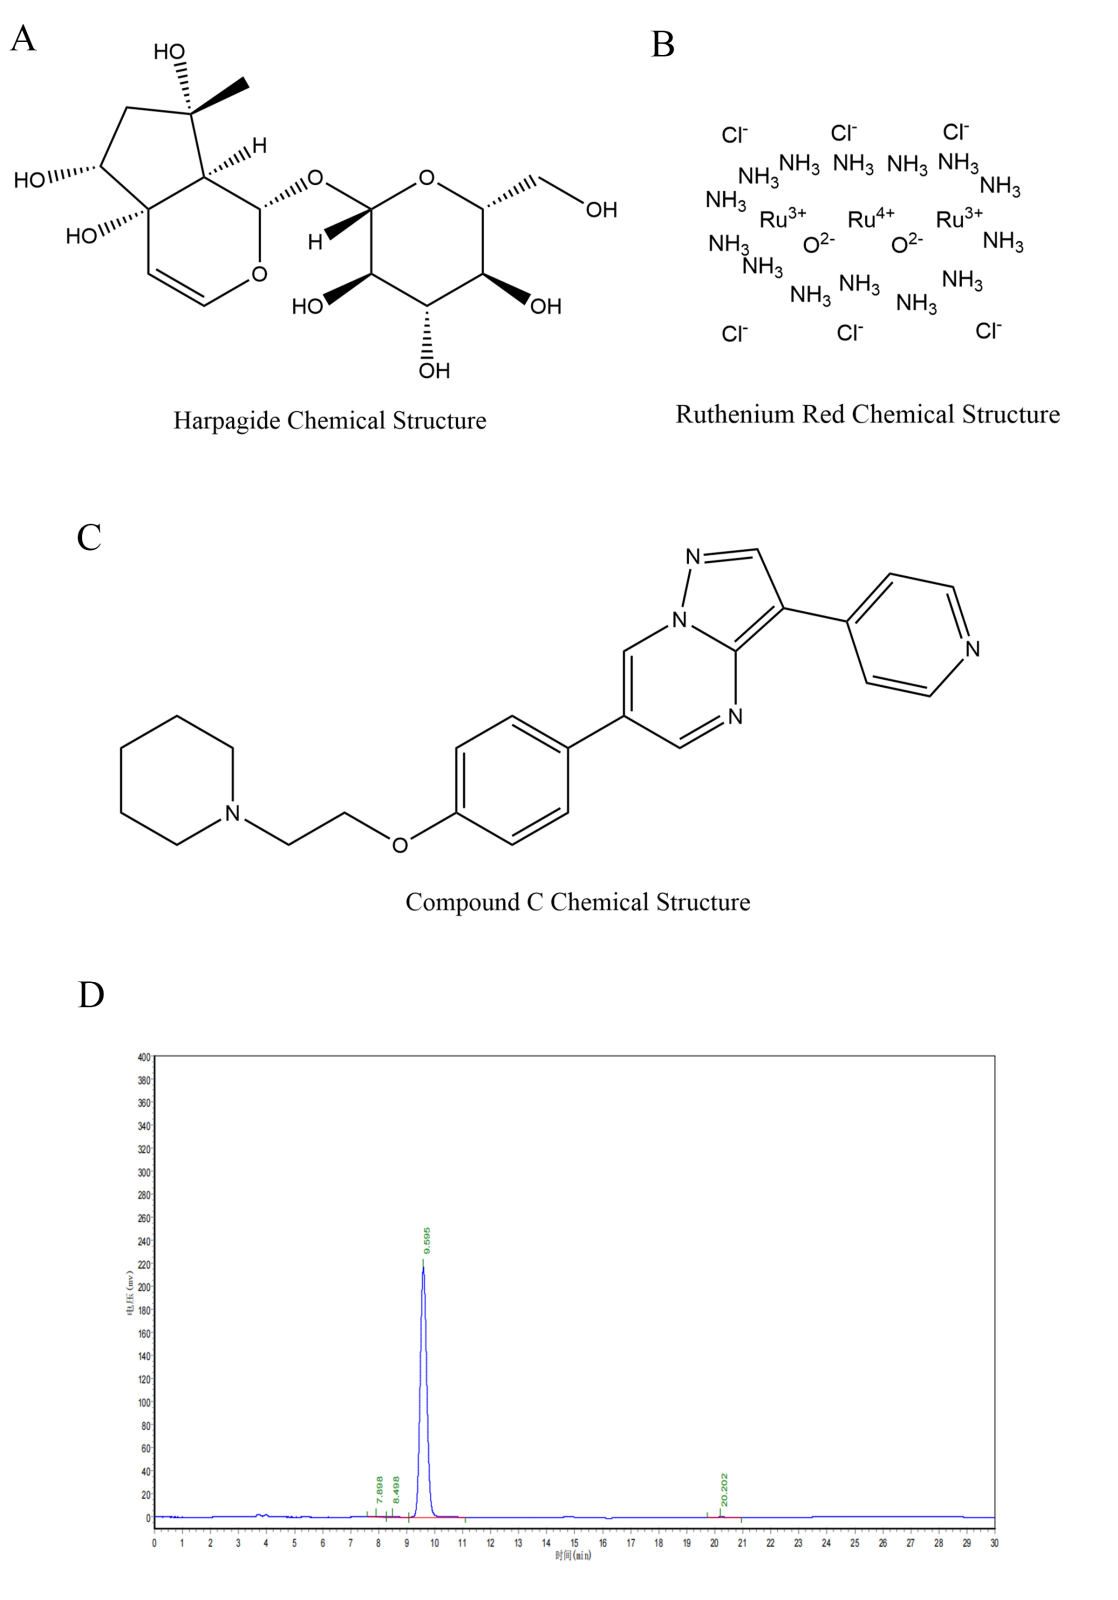


Figure S1. Quantitative Reference Material of Harpagide.(A-C) The structural formula of harpagide, Ruthenlum Red and Compound C. (D) HPLC of harpagide.

# Table S1 Primer Sequences for RT-PCR Analysis

| **Gene Target** | **Primer Sequence (5'-3')** |
| --- | --- |
| MCU | Forward: AACGCTGCCAGTTCACACTCAAG  Reverse: AAGTCATCGAGGAGCAGGAGGTC |
| AMPK | Forward: ATGATGAGGTGGTGGAGCAGAGG  Reverse: GGTTCTCGGCTGTGCTGGAATC |
| AIF | Forward: GCCTGGCGGGTGCTTTCAAG  Reverse: TGCTGGAACAAGTTGCCTGGAAG |
| Cyt c | Forward: CCAGGCTGCTGGATTCTCTTACAC  Reverse: AGGTCTGCCCTTTCTCCCTTCTTC |
| Endo G | Forward:TGGACGACACCTTCTACCTGAGC  Reverse:GCTGCGGCTGATCTTCTCAAGG |
| Casepase-3 | Forward: ACGAACGGACCTGTGGACCTG  Reverse: GTTTCGGCTTTCCAGTCAGACTCC |
| β-actin | Forward: CTGAGAGGGAAATCGTGCGTGAC  Reverse: AGGAAGAGGATGCGGCAGTGG |


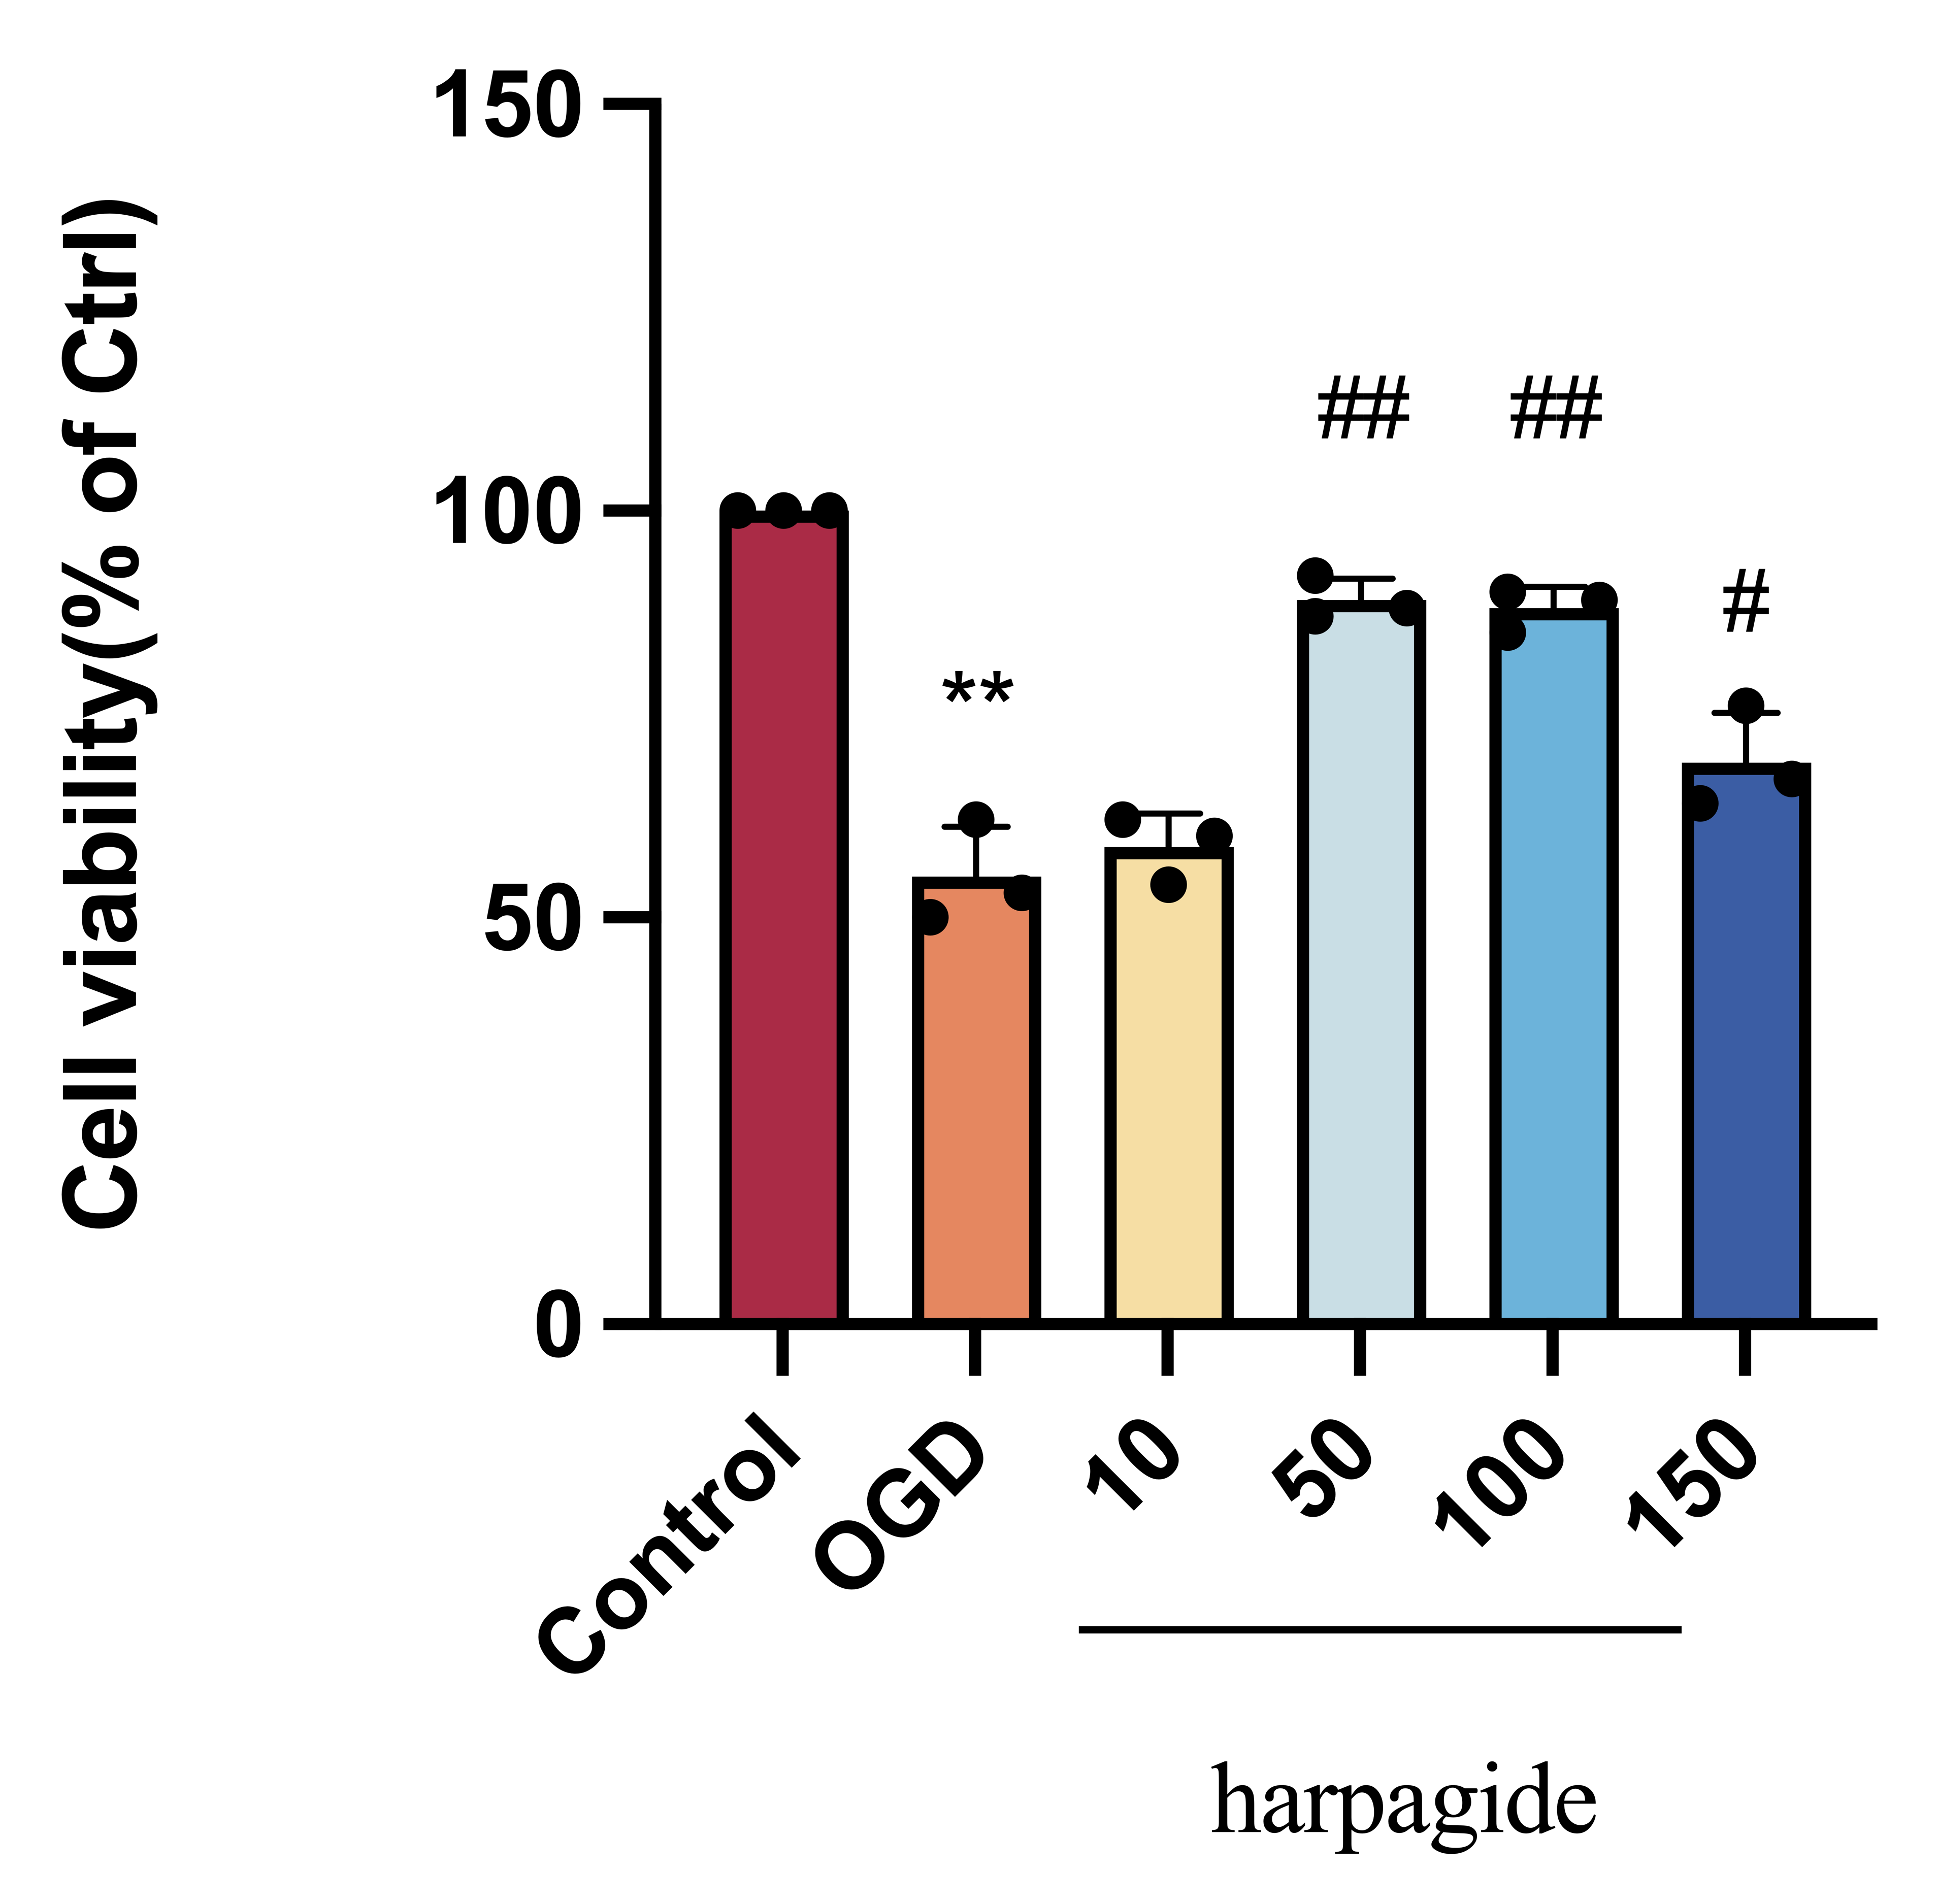


Figure S2. Dose-Dependent Protective Effects of Harpagide against OGD-Induced Injury in SH-SY5Y Cells. The effect of harpagide on the SH-SY5Y cells was assessed with an MTT assay. Harpagide showed little or no effect on cell viability at a concentration of 10 μΜ. However, compared to the OGD group, at harpagide concentrations of 50 and 100 μΜ, the cell viability significantly increased. The cell viability further increased at a concentration of 150 μΜ. The data are expressed as the percentage of total cells and are presented as the means ± SDs(n=3). **P < 0.01, significantly different from sham group. #P < 0.05, significantly different from OGD group.
